# Supplementary material for: A chiral probe for the detection of Cu(ii) by UV, CD and emission spectroscopies
Source: Royal Society of Chemistry journal article supplement (doi:10.1039/b700059f), 2007-01-01
Supplement: b700059f.pdf [file b700059f.pdf]

***A Chiral Probe for the Detection of Cu(II) by UV, CD  
and Emission Spectroscopies***

Alberto Moletti,<sup>a,b</sup> Carmine Coluccini,<sup>a</sup> Dario Pasini,<sup>\*a</sup> and Angelo Taglietti<sup>\*b</sup>

*a) Department of Organic Chemistry, University of Pavia, Viale Taramelli, 10- 27100 – Pavia, Italy. Fax: 39 0382 987323; Tel: 39 0382 987312; E-mail: [dario.pasini@unipv.it](mailto:dario.pasini@unipv.it)*

*b) Department of Inorganic Chemistry, University of Pavia, Viale Taramelli 10-27100- Pavia, Italy. Fax: +39 0382 528544; Tel: +39 0382 987329; E-mail: [angelo.taglietti@unipv.it](mailto:angelo.taglietti@unipv.it)*

**SUPPLEMENTARY INFORMATION AVAILABLE**

**Figures S1 to S5**

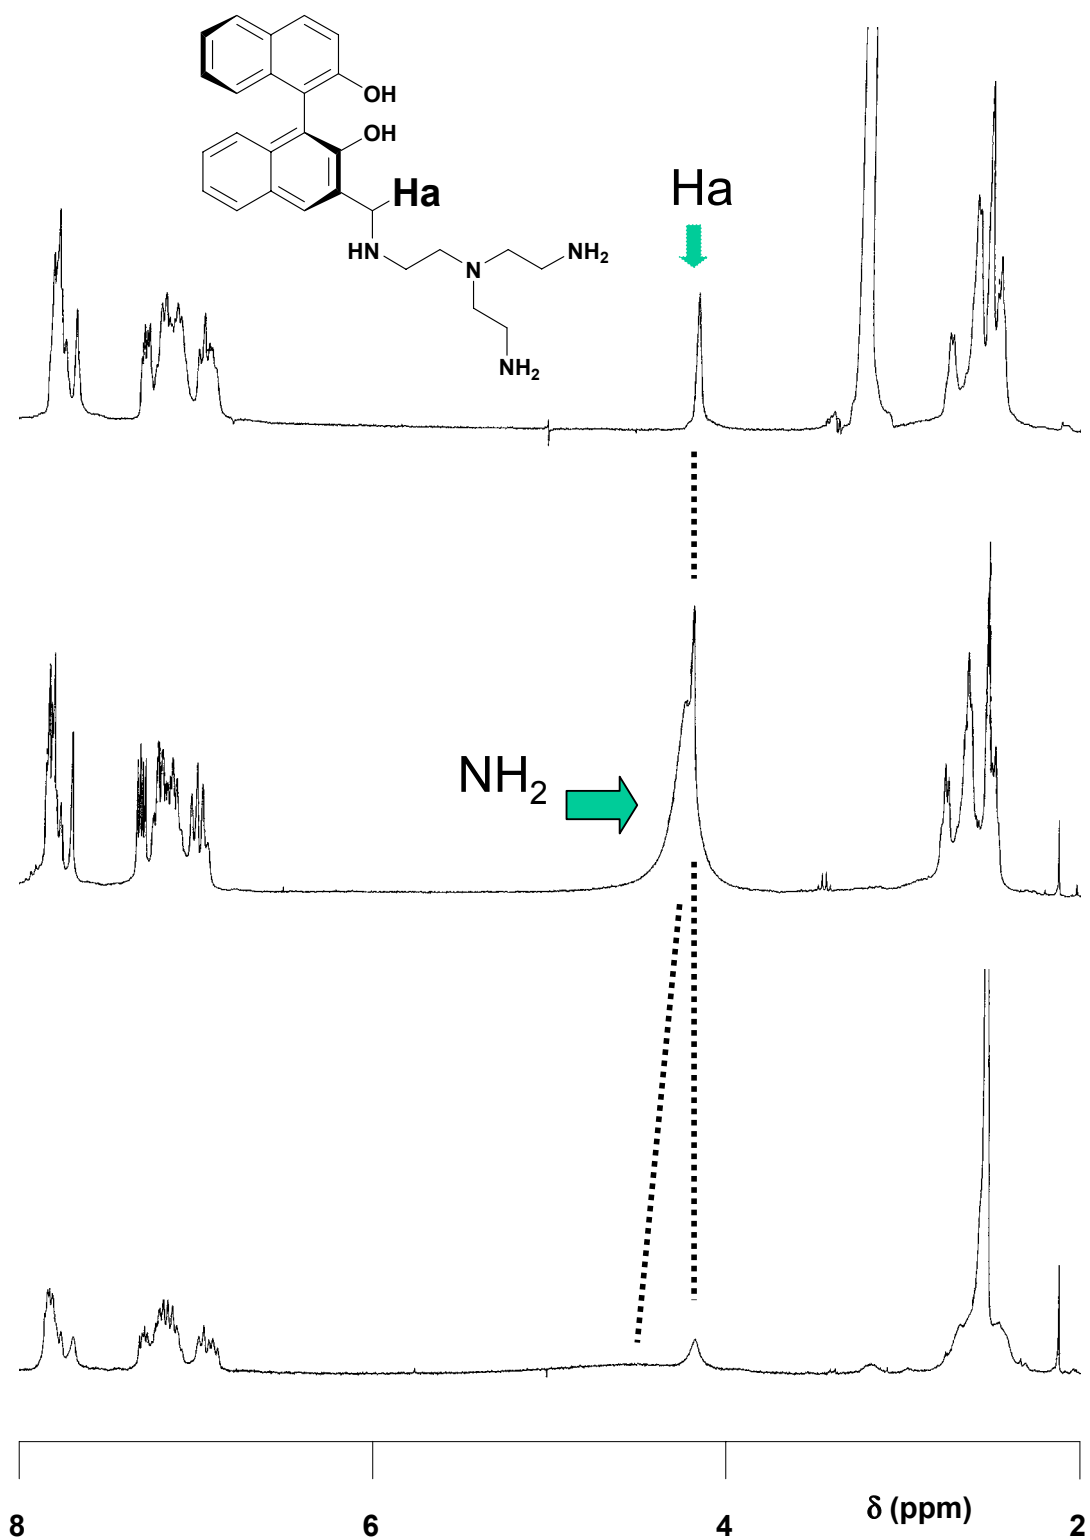

**Figure S1.**  $^1\text{H}$  NMR spectra (300 MHz) of compound (*S*)-**2**; bottom,  $d_6$ -DMSO at 30°C; middle,  $d_6$ -DMSO at 90°C; top,  $d_6$ -DMSO +D<sub>2</sub>O at 90°C.

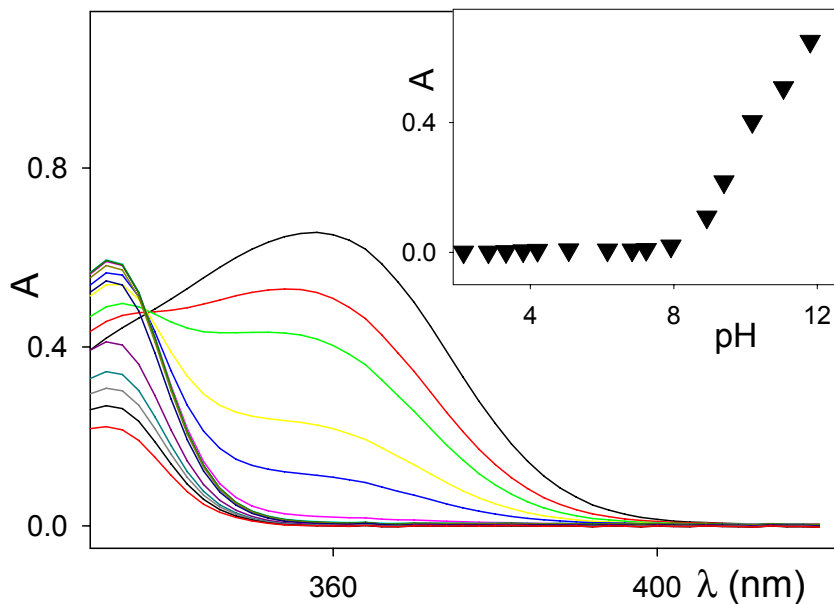

**Figure S2.** pH Spectrophotometric titration of (*S*)-**1** (5 × 10<sup>-4</sup> M) in MeOH/H<sub>2</sub>O 80/20. Inset: absorbance (360 nm) vs. pH.

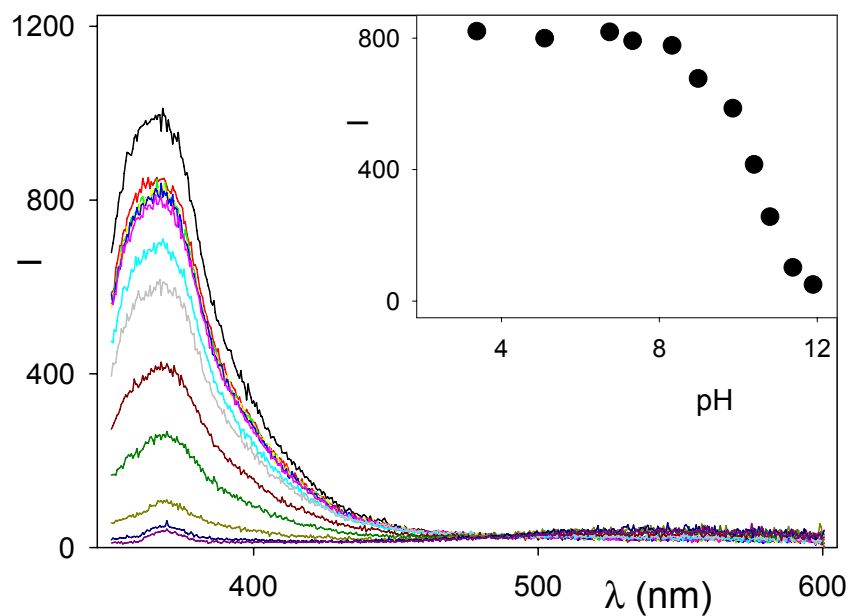

**Figure S3.** pH Spectrofluorimetric titration of (*S*)-**1** ( $10^{-5}$ M) in MeOH/H<sub>2</sub>O 80/20. Inset: fluorescence intensity (370 nm) vs. pH.

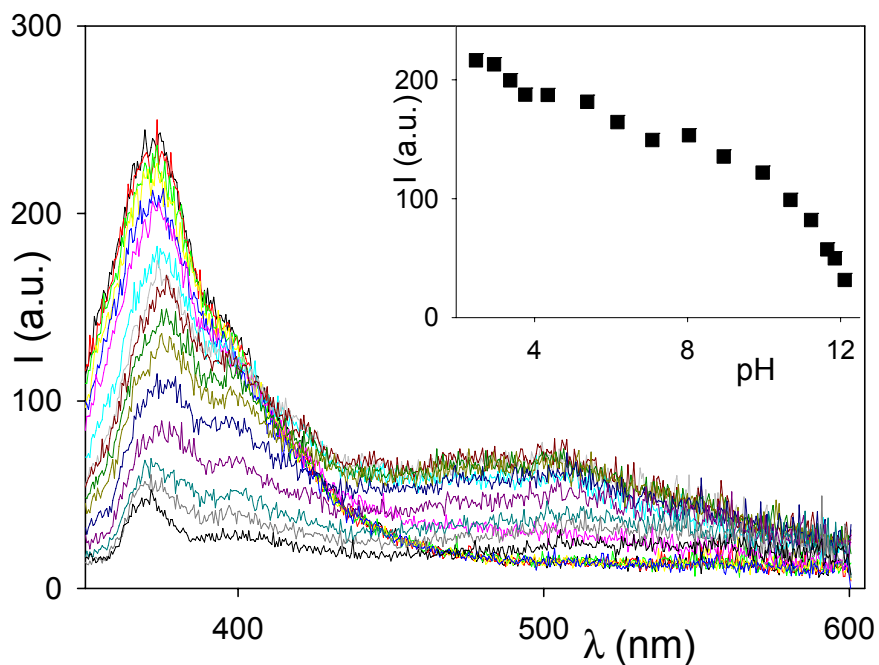

**Figure S4.** pH Spectrofluorimetric titration of (*S*)-**2** ( $10^{-5}$ M) in MeOH/H<sub>2</sub>O 80/20. Inset: fluorescence intensity (370 nm) vs. pH.

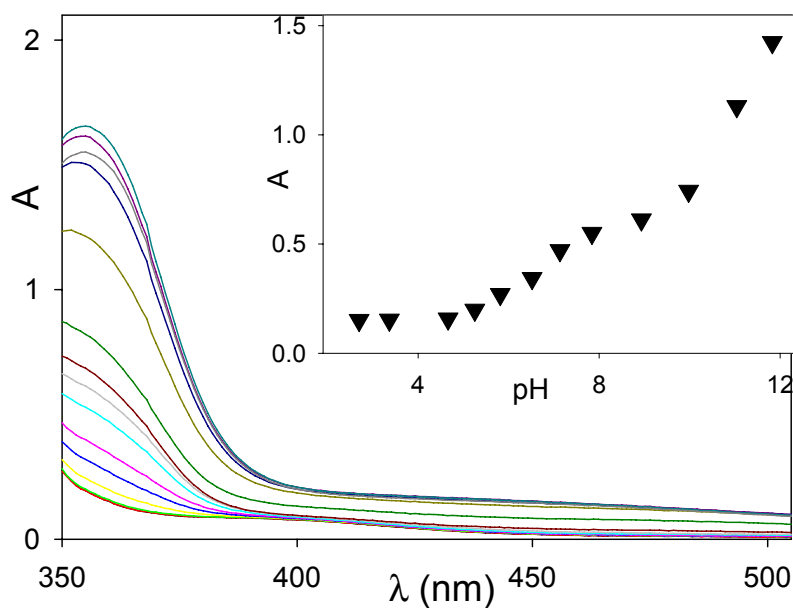

Electronic Supplementary Information for Dalton Transactions  
This journal is © The Royal Society of Chemistry 2007

**Figure S5.** pH Spectrophotometric titration of (*S*)-**2** in the presence of one equivalent of Ni(NO<sub>3</sub>)<sub>2</sub>, and (inset) absorbance at 360 nm vs pH ( $5 \times 10^{-4}$  M in MeOH/H<sub>2</sub>O 80/20).
